# Supplementary material for: Safety and tolerability of subcutaneous trastuzumab at home administration, results of the phase IIIb open-label BELIS study in HER2-positive early breast cancer
Source: Springer Nature journal article supplement (doi:10.1007/s10549-020-05604-7), 2020-04-02
Supplement: MOESM2 [file 17860156]

|   | PATIENT           | DATE       | EVENT                   | GRADE   | PERIOD | DAY OF ONSET IN TREATMENT PERIOD |
|---|-------------------|------------|-------------------------|---------|--------|----------------------------------|
| 1 | Patient 260267004 | 31/03/2015 | INJECTION SITE ERYTHEMA | GRADE1  | 3      | DAY 22                           |
|   | Patient 260267004 | 10/03/2015 | INJECTION SITE SWELLING | GRADE1  | 3      | DAY 1                            |
|   | Patient 260267004 | 21/04/2015 | INJECTION SITE SWELLING | GRADE1  | 3      | DAY 43                           |
|   | Patient 260267004 | 12/05/2015 | INJECTION SITE SWELLING | GRADE1  | 3      | DAY 64                           |
|   | Patient 260267004 | 2/06/2015  | INJECTION SITE SWELLING | GRADE1  | 3      | DAY 85                           |
|   | Patient 260267004 | 23/06/2015 | INJECTION SITE SWELLING | GRADE1  | 3      | DAY 106                          |
| 2 | Patient 260269001 | 22/07/2014 | FATIGUE                 | GRADE 1 | 2      | DAY 23                           |
|   | Patient 260269001 | 1/09/2014  | INJECTION SITE ERYTHEMA | GRADE1  | 3      | DAY 1                            |
|   | Patient 260269001 | 1/09/2014  | INJECTION SITE SWELLING | GRADE1  | 3      | DAY 1                            |
|   | Patient 260269001 | 22/09/2014 | INJECTION SITE SWELLING | GRADE1  | 3      | DAY 22                           |
|   | Patient 260269001 | 13/10/2014 | INJECTION SITE SWELLING | GRADE1  | 3      | DAY 43                           |
|   | Patient 260269001 | 3/11/2014  | INJECTION SITE SWELLING | GRADE1  | 3      | DAY 64                           |
|   | Patient 260269001 | 24/11/2014 | INJECTION SITE SWELLING | GRADE1  | 3      | DAY 85                           |
|   | Patient 260269001 | 15/12/2014 | INJECTION SITE SWELLING | GRADE1  | 3      | DAY 106                          |
| 3 | Patient 260269002 | 1/12/2014  | INJECTION SITE ERYTHEMA | GRADE1  | 2      | DAY 43                           |
|   | Patient 260269002 | 2014-12-UN | FATIGUE                 | GRADE 1 | 2      | EXACT DAY UNKNOWN                |
| 4 | Patient 260269003 | 2/02/2015  | INJECTION SITE ERYTHEMA | GRADE1  | 3      | DAY 22                           |
|   | Patient 260269003 | 13/03/2015 | FATIGUE                 | GRADE 2 | 3      | DAY 63                           |
| 5 | Patient 260269004 | 24/02/2015 | INJECTION SITE REACTION | GRADE 1 | 3      | DAY 1                            |
|   | Patient 260269004 | 17/03/2015 | INJECTION SITE SWELLING | GRADE 1 | 3      | DAY 22                           |
|   | Patient 260269004 | 7/04/2015  | INJECTION SITE SWELLING | GRADE 1 | 3      | DAY 43                           |
|   | Patient 260269004 | 28/04/2015 | INJECTION SITE SWELLING | GRADE 1 | 3      | DAY 64                           |
|   | Patient 260269004 | 28/04/2015 | FATIGUE                 | GRADE 1 | 3      | DAY 64                           |
| 6 | Patient 260273003 | 5/08/2014  | FATIGUE                 | GRADE 1 | 3      | DAY 1                            |
|   | Patient 260273003 | 26/08/2014 | FATIGUE                 | GRADE 1 | 3      | DAY 22                           |
|   | Patient 260273003 | 7/10/2014  | FATIGUE                 | GRADE 2 | 3      | DAY 64                           |
|   | Patient 260273003 | 28/10/2014 | INJECTION SITE PAIN     | GRADE 1 | 3      | DAY 85                           |
| 7 | Patient 260284001 | 12/02/2014 | FATIGUE                 | GRADE 1 | 1      | DAY 35                           |

|    |                   |            |                           |         |           |
|----|-------------------|------------|---------------------------|---------|-----------|
|    | Patient 260284001 | 5/03/2014  | FATIGUE                   | GRADE 2 | 1 DAY 56  |
|    | Patient 260284001 | 3/04/2014  | INJECTION SITE ERYTHEMA   | GRADE 1 | 2 DAY 22  |
|    | Patient 260284001 | 6/04/2014  | INJECTION SITE ERYTHEMA   | GRADE 1 | 2 DAY 25  |
|    | Patient 260284001 | 24/04/2014 | INJECTION SITE ERYTHEMA   | GRADE 1 | 2 DAY 43  |
|    | Patient 260284001 | 5/06/2014  | INJECTION SITE ERYTHEMA   | GRADE 1 | 3 DAY 22  |
|    | Patient 260284001 | 31/07/2014 | INJECTION SITE ERYTHEMA   | GRADE 1 | 3 DAY 78  |
|    | Patient 260284001 | 3/04/2014  | INJECTION SITE PAIN       | GRADE 1 | 2 DAY 22  |
| 8  | Patient 260291001 | 19/02/2014 | INJECTION SITE INFLAMMATI | GRADE 1 | 2 DAY 1   |
| 9  | Patient 260291004 | 15/05/2014 | FATIGUE                   | GRADE 1 | 1 DAY 1   |
|    | Patient 260291004 | 11/12/2014 | INJECTION SITE INFLAMMATI | GRADE 1 | 3 DAY 85  |
|    | Patient 260291004 | 30/12/2014 | INJECTION SITE SWELLING   | GRADE 1 | 3 DAY 104 |
| 10 | Patient 260292001 | 1/08/2014  | INJECTION SITE PAIN       | GRADE 1 | 3 DAY 85  |
|    | Patient 260292001 | 1/08/2014  | INJECTION SITE SWELLING   | GRADE 1 | 3 DAY 85  |
|    | Patient 260292001 | 2/08/2014  | FATIGUE                   | GRADE 2 | 3 DAY 86  |
| 12 | Patient 260292002 | 12/06/2014 | INJECTION SITE ERYTHEMA   | GRADE 1 | 3 DAY 1   |
|    | Patient 260292002 | 3/07/2014  | INJECTION SITE ERYTHEMA   | GRADE 1 | 3 DAY 22  |
|    | Patient 260292002 | 24/07/2014 | INJECTION SITE ERYTHEMA   | GRADE 1 | 3 DAY 43  |
|    | Patient 260292002 | 14/08/2014 | INJECTION SITE ERYTHEMA   | GRADE 1 | 3 DAY 64  |
|    | Patient 260292002 | 4/09/2014  | INJECTION SITE ERYTHEMA   | GRADE 1 | 3 DAY 85  |
|    | Patient 260292002 | 25/09/2014 | INJECTION SITE ERYTHEMA   | GRADE 1 | 3 DAY 106 |
|    | Patient 260292002 | 12/06/2014 | INJECTION SITE SWELLING   | GRADE 1 | 3 DAY 1   |
|    | Patient 260292002 | 24/07/2014 | INJECTION SITE SWELLING   | GRADE 1 | 3 DAY 43  |
|    | Patient 260292002 | 24/07/2014 | FATIGUE                   | GRADE 2 | 3 DAY 43  |
|    | Patient 260292002 | 14/08/2014 | INJECTION SITE SWELLING   | GRADE 1 | 3 DAY 64  |
|    | Patient 260292002 | 4/09/2014  | INJECTION SITE SWELLING   | GRADE 1 | 3 DAY 85  |
| 13 | Patient 260292004 | 29/09/2014 | INJECTION SITE ERYTHEMA   | GRADE 1 | 3 DAY 1   |
|    | Patient 260292004 | 20/10/2014 | INJECTION SITE ERYTHEMA   | GRADE 1 | 3 DAY 22  |
|    | Patient 260292004 | 10/11/2014 | INJECTION SITE ERYTHEMA   | GRADE 1 | 3 DAY 43  |
|    | Patient 260292004 | 22/12/2014 | INJECTION SITE ERYTHEMA   | GRADE 1 | 3 DAY 85  |
| 14 | Patient 260411001 | 18/02/2014 | INJECTION SITE ERYTHEMA   | GRADE 1 | 2 DAY 22  |

|    |                   |            |                           |         |                      |
|----|-------------------|------------|---------------------------|---------|----------------------|
| 15 | Patient 260411004 | 28/01/2015 | INJECTION SITE SWELLING   | GRADE 1 | 3 DAY 85             |
| 16 | Patient 260412001 | 25/04/2014 | INJECTION SITE REACTION   | GRADE 2 | 2 DAY 22             |
|    | Patient 260412001 | 18/07/2014 | INJECTION SITE REACTION   | GRADE 1 | 3 DAY 43             |
|    | Patient 260412001 | 8/08/2014  | INJECTION SITE REACTION   | GRADE 1 | 3 DAY 64             |
|    | Patient 260412001 | 8/08/2014  | FATIGUE                   | GRADE 2 | 3 DAY 64             |
|    | Patient 260412001 | 1/10/2014  | INJECTION SITE REACTION   | GRADE 1 | 3 DAY 118            |
| 17 | Patient 260412002 | 8/07/2014  | INJECTION SITE ERYTHEMA   | GRADE 1 | 3 DAY 1              |
|    | Patient 260412002 | 25/07/2014 | INJECTION SITE ERYTHEMA   | GRADE 1 | 3 DAY 18             |
|    | Patient 260412002 | 25/07/2014 | FATIGUE                   | GRADE 1 | 3 DAY 18             |
|    | Patient 260412002 | 16/08/2014 | INJECTION SITE ERYTHEMA   | GRADE 1 | 3 DAY 40             |
|    | Patient 260412002 | 7/09/2014  | INJECTION SITE ERYTHEMA   | GRADE 1 | 3 DAY 62             |
|    | Patient 260412002 | 26/09/2014 | INJECTION SITE ERYTHEMA   | GRADE 1 | 3 DAY 81             |
|    | Patient 260412002 | 17/10/2014 | INJECTION SITE ERYTHEMA   | GRADE 1 | 3 DAY 102            |
| 18 | Patient 260412003 | 14/11/2014 | INJECTION SITE ERYTHEMA   | GRADE 1 | 3 DAY 1              |
|    | Patient 260412003 | 5/12/2014  | INJECTION SITE ERYTHEMA   | GRADE 1 | 3 DAY 22             |
|    | Patient 260412003 | 26/12/2014 | INJECTION SITE ERYTHEMA   | GRADE 1 | 3 DAY 43             |
|    | Patient 260412003 | 16/01/2015 | INJECTION SITE ERYTHEMA   | GRADE 1 | 3 DAY 64             |
|    | Patient 260412003 | 6/02/2015  | INJECTION SITE ERYTHEMA   | GRADE 1 | 3 DAY 85             |
|    | Patient 260412003 | 27/02/2015 | INJECTION SITE ERYTHEMA   | GRADE 1 | 3 DAY 106            |
|    | Patient 260412003 | 14/11/2014 | INJECTION SITE INDURATION | GRADE 1 | 3 DAY 1              |
|    | Patient 260412003 | 26/12/2014 | INJECTION SITE INDURATION | GRADE 1 | 3 DAY 43             |
|    | Patient 260412003 | 16/01/2015 | INJECTION SITE INDURATION | GRADE 1 | 3 DAY 64             |
|    | Patient 260412003 | 6/02/2015  | INJECTION SITE INDURATION | GRADE 1 | 3 DAY 85             |
|    | Patient 260412003 | 5/12/2014  | INJECTION SITE PAIN       | GRADE 1 | 3 DAY 22             |
|    | Patient 260412003 | 5/12/2014  | INJECTION SITE SWELLING   | GRADE 1 | 3 DAY 22             |
|    | Patient 260412003 | 26/12/2014 | INJECTION SITE SWELLING   | GRADE 1 | 3 DAY 43             |
|    | Patient 260412003 | 5/12/2014  | INJECTION SITE WARMTH     | GRADE 1 | 3 DAY 22             |
|    | Patient 260412003 | 16/01/2015 | INJECTION SITE WARMTH     | GRADE 1 | 3 DAY 64             |
|    | Patient 260412003 | 2015-01-UN | FATIGUE                   | GRADE 1 | 3 EXACT DATE UNKNOWN |
| 19 | Patient 260414001 | 24/06/2014 | INJECTION SITE ERYTHEMA   | GRADE 1 | 3 DAY 2              |
|    | Patient 260414001 | 15/07/2014 | INJECTION SITE ERYTHEMA   | GRADE 1 | 3 DAY 22             |

|    |                   |            |                           |         |           |
|----|-------------------|------------|---------------------------|---------|-----------|
|    | Patient 260414001 | 5/08/2014  | INJECTION SITE ERYTHEMA   | GRADE 1 | 3 DAY 43  |
|    | Patient 260414001 | 26/08/2014 | INJECTION SITE ERYTHEMA   | GRADE 1 | 3 DAY 64  |
|    | Patient 260414001 | 16/09/2014 | INJECTION SITE ERYTHEMA   | GRADE 1 | 3 DAY 85  |
|    | Patient 260414001 | 7/10/2014  | INJECTION SITE ERYTHEMA   | GRADE 1 | 3 DAY 106 |
|    | Patient 260414001 | 22/04/2014 | INJECTION SITE INDURATION | GRADE 1 | 2 DAY 1   |
|    | Patient 260414001 | 13/05/2014 | INJECTION SITE INDURATION | GRADE 1 | 2 DAY 22  |
|    | Patient 260414001 | 22/04/2014 | INJECTION SITE PAIN       | GRADE 1 | 2 DAY 1   |
|    | Patient 260414001 | 26/08/2014 | INJECTION SITE SWELLING   | GRADE 1 | 3 DAY 64  |
| 20 | Patient 260414002 | 30/09/2014 | INJECTION SITE ERYTHEMA   | GRADE 1 | 3 DAY 1   |
|    | Patient 260414002 | 9/09/2014  | INJECTION SITE SWELLING   | GRADE 1 | 2 DAY 43  |
| 21 | Patient 260414003 | 15/07/2014 | FATIGUE                   | GRADE 2 | 1 DAY 22  |
|    | Patient 260414003 | 7/10/2014  | INJECTION SITE SWELLING   | GRADE 1 | 2 DAY 43  |
|    | Patient 260414003 | 28/10/2014 | INJECTION SITE SWELLING   | GRADE 1 | 3 DAY 1   |
|    | Patient 260414003 | 14/11/2014 | INJECTION SITE SWELLING   | GRADE 1 | 3 DAY 18  |
| 22 | Patient 260414004 | 4/07/2014  | FATIGUE                   | GRADE 1 | 1 DAY 22  |
|    | Patient 260414004 | 25/09/2014 | FATIGUE                   | GRADE 3 | 2 DAY 43  |
|    | Patient 260414004 | 19/02/2015 | INJECTION SITE SWELLING   | GRADE 1 | 3 DAY 127 |
| 23 | Patient 264555002 | 14/10/2014 | INJECTION SITE HAEMATOMA  | GRADE 1 | 3 DAY 23  |
|    | Patient 264555002 | 3/11/2014  | INJECTION SITE HAEMATOMA  | GRADE 1 | 3 DAY 43  |
|    | Patient 264555002 | 13/10/2014 | INJECTION SITE PAIN       | GRADE 1 | 3 DAY 22  |
|    | Patient 264555002 | 3/11/2014  | INJECTION SITE PAIN       | GRADE 1 | 3 DAY 43  |
|    | Patient 264555002 | 24/11/2014 | INJECTION SITE PAIN       | GRADE 1 | 3 DAY 64  |
|    | Patient 264555002 | 14/12/2014 | INJECTION SITE PAIN       | GRADE 1 | 3 DAY 84  |
| 24 | Patient 264555003 | 4/01/2015  | INJECTION SITE OEDEMA     | GRADE 1 | 3 DAY 91  |
| 25 | Patient 264555004 | 1/02/2015  | INJECTION SITE HAEMATOMA  | GRADE 1 | 3 DAY 85  |
|    | Patient 264555004 | 12/01/2015 | INJECTION SITE PAIN       | GRADE 2 | 3 DAY 65  |
| 26 | Patient 264555006 | 10/12/2014 | INJECTION SITE HAEMATOMA  | GRADE 1 | 3 DAY 1   |
|    | Patient 264555006 | 10/12/2014 | INJECTION SITE SWELLING   | GRADE 1 | 3 DAY 1   |

|    |                   |            |                         |         |   |                    |
|----|-------------------|------------|-------------------------|---------|---|--------------------|
| 27 | Patient 264555007 | 19/10/2014 | FATIGUE                 | GRADE 1 | 2 | DAY 22             |
|    | Patient 264555007 | 30/11/2014 | INJECTION SITE PAIN     | GRADE 1 | 3 | DAY 1              |
|    | Patient 264555007 | 21/12/2014 | INJECTION SITE PAIN     | GRADE 1 | 3 | DAY 22             |
|    | Patient 264555007 | 12/01/2015 | INJECTION SITE PAIN     | GRADE 1 | 3 | DAY 44             |
|    | Patient 264555007 | 1/02/2015  | INJECTION SITE PAIN     | GRADE 1 | 3 | DAY 64             |
| 28 | Patient 264556004 | 17/11/2014 | INJECTION SITE ERYTHEMA | GRADE 1 | 2 | DAY 1              |
|    | Patient 264556004 | 8/12/2014  | INJECTION SITE ERYTHEMA | GRADE 1 | 2 | DAY 22             |
|    | Patient 264556004 | 19/01/2015 | INJECTION SITE ERYTHEMA | GRADE 1 | 3 | DAY 1              |
| 29 | Patient 264558001 | 7/10/2014  | INJECTION SITE ERYTHEMA | GRADE 1 | 2 | DAY 1              |
|    | Patient 264558001 | 10/02/2015 | INJECTION SITE ERYTHEMA | GRADE 1 | 3 | DAY 64             |
| 30 | Patient 264559002 | 15/05/2014 | INJECTION SITE PAIN     | GRADE 1 | 2 | DAY 1              |
| 31 | Patient 264559003 | 17/07/2014 | INJECTION SITE PAIN     | GRADE 1 | 2 | DAY 1              |
|    | Patient 264559003 | 17/07/2014 | INJECTION SITE RASH     | GRADE 1 | 2 | DAY 1              |
|    | Patient 264559003 | 2014-10-UN | FATIGUE                 | GRADE 1 | 3 | EXACT DATE UNKNOWN |
| 32 | Patient 264559004 | 19/10/2014 | INJECTION SITE PAIN     | GRADE 1 | 2 | DAY 46             |
|    | Patient 264559004 | 29/01/2015 | INJECTION SITE PAIN     | GRADE 1 | 3 | DAY 82             |
|    | Patient 264559004 | 18/02/2015 | INJECTION SITE PAIN     | GRADE 1 | 3 | DAY 102            |
|    | Patient 264559004 | 4/09/2014  | INJECTION SITE RASH     | GRADE 1 | 2 | DAY 1              |
|    | Patient 264559004 | 11/01/2015 | FATIGUE                 | GRADE 1 | 3 | DAY 64             |
|    | Patient 264559004 | 29/01/2015 | INJECTION SITE RASH     | GRADE 1 | 3 | DAY 82             |
| 33 | Patient 264560003 | 26/06/2014 | INJECTION SITE PAIN     | GRADE 1 | 2 | DAY 44             |
| 34 | Patient 264560006 | 17/09/2014 | INJECTION SITE PAIN     | GRADE 2 | 2 | DAY 1              |
|    | Patient 264560006 | 12/10/2014 | INJECTION SITE PAIN     | GRADE 3 | 2 | DAY 26             |
| 35 | Patient 264560007 | 12/01/2015 | INJECTION SITE PAIN     | GRADE 2 | 2 | DAY 2              |
|    | Patient 264560007 | 7/04/2015  | INJECTION SITE SWELLING | GRADE 2 | 3 | DAY 23             |
| 36 | Patient 264560008 | 4/05/2015  | INJECTION SITE PAIN     | GRADE 2 | 3 | DAY 22             |
|    | Patient 264560008 | 27/05/2015 | INJECTION SITE PAIN     | GRADE 2 | 3 | DAY 45             |

|    |                   |            |                           |         |                      |
|----|-------------------|------------|---------------------------|---------|----------------------|
| 37 | Patient 264562005 | 1/02/2015  | INJECTION SITE MACULE     | GRADE 1 | 2 DAY 26             |
| 38 | Patient 266042002 | 23/12/2014 | INJECTION SITE INFLAMMATI | GRADE 1 | 3 DAY 63             |
| 39 | Patient 260271001 | 5/03/2014  | FATIGUE                   | GRADE 1 | 2 DAY 43             |
| 40 | Patient 260271003 | 18/12/2014 | FATIGUE                   | GRADE 1 | 3 DAY 85             |
| 41 | Patient 260284002 | 26/02/2014 | FATIGUE                   | GRADE 2 | 1 DAY 1              |
| 42 | Patient 260284004 | 30/12/2014 | FATIGUE                   | GRADE 1 | 1 DAY 22             |
| 43 | Patient 260291002 | 9/10/2014  | FATIGUE                   | GRADE 1 | 3 DAY 1              |
| 44 | Patient 260410001 | 12/05/2014 | FATIGUE                   | GRADE 1 | 1 DAY 25             |
| 45 | Patient 260411002 | 15/04/2014 | FATIGUE                   | GRADE 1 | 2 DAY 22             |
| 46 | Patient 260411003 | 13/05/2014 | FATIGUE                   | GRADE 1 | 1 DAY 22             |
|    | Patient 260411003 | 3/06/2014  | FATIGUE                   | GRADE 1 | 1 DAY 43             |
| 47 | Patient 264554006 | 2015-03-UN | FATIGUE                   | GRADE 2 | 3 EXACT DATE UNKNOWN |
| 48 | Patient 264554007 | 25/01/2015 | FATIGUE                   | GRADE 2 | 3 DAY 1              |
| 49 | Patient 264554008 | 30/04/2015 | FATIGUE                   | GRADE 2 | 3 DAY 134            |
| 50 | Patient 264560004 | 1/05/2014  | FATIGUE                   | GRADE 1 | 1 DAY 9              |
| 51 | Patient 266042003 | 23/03/2015 | FATIGUE                   | GRADE 1 | 3 DAY 65             |
| 52 | Patient 267441001 | 2014-09-UN | FATIGUE                   | GRADE 1 | 3 EXACT DATE UNKNOWN |
| 53 | Patient 267441002 | 16/09/2014 | FATIGUE                   | GRADE 2 | 3 DAY 37             |

|    |                   |            |         |         |   |                    |
|----|-------------------|------------|---------|---------|---|--------------------|
| 54 | Patient 267441003 | 2015-05-UN | FATIGUE | GRADE 1 | 3 | EXACT DATE UNKNOWN |
|    | Patient 267441003 | 8/09/2014  | FATIGUE | GRADE 1 | 3 | DAY 12             |
|    | Patient 267441003 | 31/10/2014 | FATIGUE | GRADE 1 | 3 | DAY 65             |
|    | Patient 267441003 | 21/11/2014 | FATIGUE | GRADE 1 | 3 | DAY 86             |
| 55 | Patient 267441004 | 31/10/2014 | FATIGUE | GRADE 1 | 3 | DAY 1              |
